# Supplementary material for: Continuous Light Does Not Affect Atherosclerosis in APOE*3-Leiden.CETP Mice
Source: PubMed Central journal article supplement (PMC7683885; doi:10.1177/0748730420951320), 2020-09-11
Supplement: Supplemental_Material_Journal_of_Biological_Rhythms.pdf [file Supplemental_Material_Journal_of_Biological_Rhythms.pdf]

## **Supplemental Material**

### **Continuous light does not affect atherosclerosis in APOE\*3-Leiden.CETP mice**

Maike Schilperoort, Rosa van den Berg, Claudia P. Coomans, Padmini P.S.J. Khedoe, Ashna Ramkisoensing, Sanne Boekestijn, Yanan Wang, Jimmy F.P. Berbée, Johanna H. Meijer, Nienke R. Biermasz, Patrick C.N. Rensen, Sander Kooijman

## Supplementary Tables and Figures

**Table S1. Primer Sequences for qRT-PCR**

| Gene           | Primer sequence                                                                  | Product length (bp) |
|----------------|----------------------------------------------------------------------------------|---------------------|
| <i>36b4</i>    | Forward 5'– GGACCCGAGAAGACCTCCTT –3'<br>Reverse 5'– GCACATCACTCAGAATTTCAATGG –3' | 85                  |
| <i>Bmal1</i>   | Forward 5'– ATGCCAAGACTGGACTTCCG –3'<br>Reverse 5'– TGCAGAAGCTTTTTTCGATCTGC –3'  | 180                 |
| <i>Clock</i>   | Forward 5'– AGTTAGGGCTGAAAGACGGC –3'<br>Reverse 5'– GGTGTGGAGGAAGGGTCTGA –3'     | 216                 |
| <i>Cry1</i>    | Forward 5'– AGAGGGCTAGGTCTTCTCGC –3'<br>Reverse 5'– GTGAGTCTGCTGACTGTCCC –3'     | 222                 |
| <i>Cry2</i>    | Forward 5'– CCAGAGCACTATCCAGTGGC –3'<br>Reverse 5'– GCGATGGCTCTCCAGTCTC –3'      | 154                 |
| <i>Per1</i>    | Forward 5'– ACGGCCAGGTGTCGTGATTA –3'<br>Reverse 5'– CCCTTCTAGGGGACCACTCA –3'     | 162                 |
| <i>Per2</i>    | Forward 5'– TGTGTGCTTACACGGGTGTCCTA –3'<br>Reverse 5'– ACGTTTGGTTTGCGCATGAA –3'  | 142                 |
| <i>Reverba</i> | Forward 5'– GTGCTTGTCTCTGCAGACCG –3'<br>Reverse 5'– TTGGTGAAGCGGGAAGTCTC –3'     | 131                 |

**Table S2. Values of statistical testing by two-tailed unpaired T test**

| <b>Parameter</b>                  | <b>T-value</b> | <b>Degrees of freedom (df)</b> | <b>P-value</b>    |
|-----------------------------------|----------------|--------------------------------|-------------------|
| Food intake                       | 2.442          | 34                             | <b>0.0200</b>     |
| Fat mass                          | <b>1.052</b>   | 33                             | 0.3006            |
| Lean mass                         | 1.342          | 33                             | 0.1887            |
| Organ weight - Liver              | 0.662          | 34                             | 0.5126            |
| Organ weight – Spleen             | 1.718          | 34                             | 0.0952            |
| Organ weight – iBAT               | 1.649          | 34                             | 0.1083            |
| Organ weight – gWAT               | 1.190          | 34                             | 0.2422            |
| Organ weight – sWAT               | 0.747          | 34                             | 0.4600            |
| Cholesterol exposure              | 2.013          | 34                             | 0.0521            |
| Bone marrow WBCs                  | 2.765          | 33                             | <b>0.0092</b>     |
| Bone marrow RBCs                  | 2.821          | 34                             | <b>0.0079</b>     |
| Bone marrow PLTs                  | 1.742          | 34                             | 0.0905            |
| Blood WBCs                        | 4.007          | 34                             | <b>0.0003</b>     |
| Blood RBCs                        | 0.659          | 34                             | 0.5142            |
| Blood PLTs                        | 2.610          | 34                             | <b>0.0134</b>     |
| Blood neutrophils                 | 1.507          | 28                             | 0.1430            |
| Blood lymphocytes                 | 0.894          | 29                             | 0.3787            |
| Blood monocytes                   | 0.456          | 29                             | 0.6518            |
| Blood eosinophils                 | 0.108          | 29                             | 0.9145            |
| Blood basophils                   | 2.204          | 34                             | <b>0.0344</b>     |
| Atherosclerotic lesion area       | 0.620          | 33                             | 0.5396            |
| Lesion severity - mild            | 1.552          | 32                             | 0.1302            |
| Lesion severity - severe          | 1.550          | 32                             | 0.1309            |
| Rhythm strength                   | 2.455          | 24                             | <b>0.0217</b>     |
| Rhythm period                     | 10.26          | 24                             | <b>&lt;0.0001</b> |
| <i>Clock</i> expression in iBAT   | 0.381          | 16                             | 0.7082            |
| <i>Bmal1</i> expression in iBAT   | 2.133          | 16                             | <b>0.0487</b>     |
| <i>Reverba</i> expression in iBAT | 4.514          | 16                             | <b>0.0004</b>     |
| <i>Cry1</i> expression in iBAT    | 3.541          | 16                             | <b>0.0027</b>     |
| <i>Cry2</i> expression in iBAT    | 2.330          | 16                             | <b>0.0332</b>     |
| <i>Per1</i> expression in iBAT    | 0.709          | 16                             | 0.4883            |
| <i>Per2</i> expression in iBAT    | 3.005          | 16                             | <b>0.0084</b>     |
| <i>Clock</i> expression in gWAT   | 2.241          | 16                             | <b>0.0396</b>     |
| <i>Bmal1</i> expression in gWAT   | 0.017          | 16                             | 0.9870            |
| <i>Reverba</i> expression in gWAT | 3.606          | 16                             | <b>0.0024</b>     |

|                                    |       |    |               |
|------------------------------------|-------|----|---------------|
| <i>Cry1</i> expression in gWAT     | 1.080 | 16 | 0.2961        |
| <i>Cry2</i> expression in gWAT     | 1.140 | 16 | 0.2711        |
| <i>Per1</i> expression in gWAT     | 0.645 | 16 | 0.5278        |
| <i>Per2</i> expression in gWAT     | 1.921 | 16 | 0.0728        |
| <i>Clock</i> expression in liver   | 0.856 | 16 | 0.4044        |
| <i>Bmal1</i> expression in liver   | 0.721 | 16 | 0.4815        |
| <i>Reverba</i> expression in liver | 2.825 | 16 | <b>0.0122</b> |
| <i>Cry1</i> expression in liver    | 1.532 | 16 | 0.1452        |
| <i>Cry2</i> expression in liver    | 1.391 | 16 | 0.1831        |
| <i>Per1</i> expression in liver    | 1.087 | 16 | 0.2932        |
| <i>Per2</i> expression in liver    | 0.514 | 16 | 0.6146        |
| <i>Clock</i> expression in aorta   | 0.846 | 15 | 0.4109        |
| <i>Bmal1</i> expression in aorta   | 1.021 | 15 | 0.3236        |
| <i>Reverba</i> expression in aorta | 3.198 | 15 | <b>0.0060</b> |
| <i>Cry1</i> expression in aorta    | 1.821 | 15 | 0.0886        |
| <i>Cry2</i> expression in aorta    | 0.248 | 15 | 0.8076        |
| <i>Per1</i> expression in aorta    | 0.983 | 15 | 0.3410        |
| <i>Per2</i> expression in aorta    | 2.364 | 15 | <b>0.0320</b> |

*P*-values are marked bold when statistically significant ( $P < 0.05$ ).

**Table S3. Values of statistical testing by ANOVA or mixed-effects models**

| Parameter              | Statistical test including group, time and group*time interaction effects                                                                                                                             | Adjusted P-values of Sidak's post hoc test                                                                                                                                                                                                                                                                                      |
|------------------------|-------------------------------------------------------------------------------------------------------------------------------------------------------------------------------------------------------|---------------------------------------------------------------------------------------------------------------------------------------------------------------------------------------------------------------------------------------------------------------------------------------------------------------------------------|
| Cumulative food intake | <u>Two-way ANOVA</u><br>Group $F(1, 6) = 1.563$ ; $P = 0.258$<br>Time $F(1.260, 7.559) = 1462$ ; <b><math>P &lt; 0.0001</math></b><br>Interaction $F(10, 60) = 2.253$ ; <b><math>P = 0.026</math></b> | T $\approx$ 1 week >0.999<br>T $\approx$ 3 weeks >0.999<br>T $\approx$ 4 weeks 0.996<br>T $\approx$ 5 weeks 0.979<br>T $\approx$ 6 weeks 0.962<br>T $\approx$ 7 weeks 0.901<br>T $\approx$ 8 weeks 0.887<br>T $\approx$ 9 weeks 0.924<br>T $\approx$ 10 weeks 0.931<br>T $\approx$ 11 weeks 0.975<br>T $\approx$ 12 weeks 0.984 |

|                                        |                                                                                                                                                                        |                                                                                                                                                                                                             |
|----------------------------------------|------------------------------------------------------------------------------------------------------------------------------------------------------------------------|-------------------------------------------------------------------------------------------------------------------------------------------------------------------------------------------------------------|
| Body weight                            | <u>Two-way ANOVA</u><br>Group F (1, 34) = 0.007; P=0.934<br>Time F (2.752, 93.55) = 137.2; <b>P&lt;0.0001</b><br>Interaction F (5, 170) = 3.502; <b>P=0.005</b>        | T=0 weeks 0.782<br>T=2 weeks >0.999<br>T=4 weeks >0.999<br>T=8 weeks 0.989<br>T=12 weeks 0.865<br>T=14 weeks 0.996                                                                                          |
| Triglycerides                          | <u>Mixed-effects models</u><br>Group F (1, 34) = 2.028; P=0.164<br>Time F (5, 162) = 16.49; <b>P&lt;0.0001</b><br>Interaction F (5, 162) = 2.101; P=0.068              | T=0 weeks 0.999<br>T=2 weeks 0.848<br>T=4 weeks 0.057<br>T=8 weeks 0.909<br>T=12 weeks 0.985<br>T=14 weeks 0.501                                                                                            |
| Total cholesterol                      | <u>Mixed-effects models</u><br>Group F (1, 34) = 4.042; P=0.052<br>Time F (3.160, 99.84) = 44.11; <b>P&lt;0.0001</b><br>Interaction F (5, 158) = 2.801; <b>P=0.019</b> | T=0 weeks 0.999<br>T=2 weeks 0.583<br>T=4 weeks 0.234<br>T=8 weeks 0.379<br>T=12 weeks 0.205<br>T=14 weeks 0.954                                                                                            |
| HDL cholesterol                        | <u>Mixed-effects models</u><br>Group F (1,33) = 0.1119; P=0.740<br>Time F (2, 58) = 8.369; <b>P=0.0006</b><br>Interaction F (2, 58) = 0.967; P=0.386                   | T=8 weeks 0.930<br>T=12 weeks 0.807<br>T=14 weeks 0.765                                                                                                                                                     |
| Non-HDL cholesterol                    | <u>Mixed-effects models</u><br>Group F (1,33) = 5.771; <b>P=0.022</b><br>Time F (1.936, 49.36) = 20.52; <b>P&lt;0.0001</b><br>Interaction F (2, 51) = 1.506; P=0.2315  | T=8 weeks 0.219<br>T=12 weeks <b>0.038</b><br>T=14 weeks 0.542                                                                                                                                              |
| Rhythm strength per day (LD vs. LD-DL) | <u>Two-way ANOVA</u><br>Group F (1, 11) = 1.238; P=0.290<br>Time F (1.409, 15.50) = 14.17; <b>P=0.0008</b><br>Interaction F (9, 99) = 11.89; <b>P&lt;0.0001</b>        | T=95 days >0.999<br>T=96 days >0.999<br>T=97 days >0.999<br>T=98 days 0.172<br>T=99 days <b>0.003</b><br>T=100 days 0.179<br>T=101 days 0.938<br>T=102 days 0.974<br>T=103 days >0.999<br>T=104 days >0.999 |

*P-values are marked bold when statistically significant (P<0.05).*

**Table S4. Values of Pearson correlation analyses**

| Correlation                                         | Group | R-squared | 95% Confidence interval | P-value |
|-----------------------------------------------------|-------|-----------|-------------------------|---------|
| Atherosclerotic lesion area with rhythm strength    | LD&LL | 0.0372    | -0.2189 to 0.5464       | 0.3555  |
|                                                     | LD    | 0.3956    | -0.9241 to 0.1360       | 0.0948  |
|                                                     | LL    | 0.3565    | -0.1499 to 0.7147       | 0.1602  |
| Severe atherosclerotic lesions with rhythm strength | LD&LL | 0.00044   | -0.3856 to 0.4209       | 0.9221  |
|                                                     | LD    | 0.02863   | -0.6079 to 0.7808       | 0.6887  |
|                                                     | LL    | 0.00012   | -0.5039 to 0.4874       | 0.9679  |

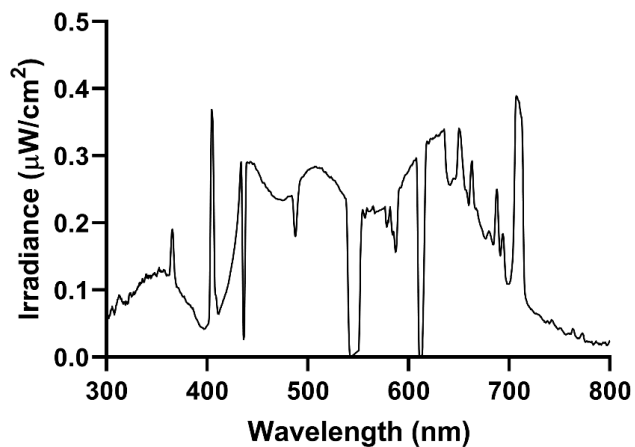

**Figure S1. Spectral power distribution of the light source.** Mice were housed in light-tight cabinets fitted with diffuse white fluorescent light of ~100 lux. The spectral power distribution of the light source was measured with an AvaSpec 2048-SPU (Avantes BV, Apeldoorn, The Netherlands) light meter. Adapted from Schilperoort *et al*, J Pineal Res, 2020 (DOI:10.1111/jpi.12614).

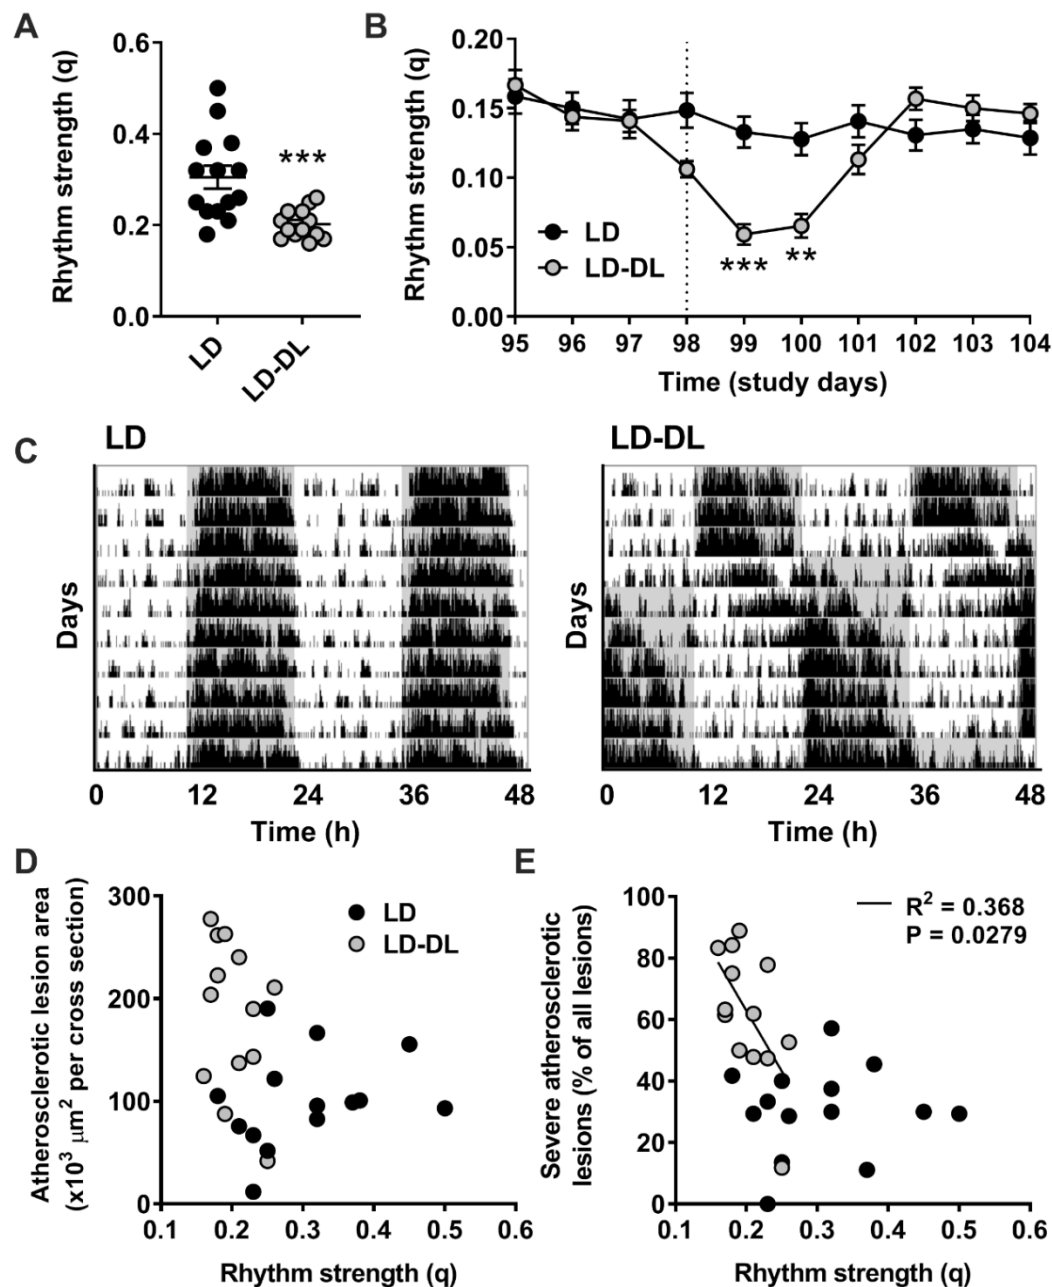

**Figure S2. Shifts in light-dark cycle promote a strong acute reduction in rhythm strength, which correlates to atherosclerotic lesion severity.** APOE\*3-Leiden.CETP mice fed a Western-type diet were exposed to either regular light-dark cycles (LD) or weekly alternating light-dark cycles (12 h shifts; LD-DL) ( $n = 15/\text{group}$ ) for 15 weeks. During week 14 and 15 of the light intervention, mice were housed individually in cages fitted with passive infrared detectors to assess behavioral activity patterns. F-periodogram analysis was performed to calculate the rhythm strength per week (A) and per day (B), and the dotted line in figure panel B indicates the day on which the LD cycle is shifted for the LD-DL group. Representative double-plotted actograms of LD and LL mice are shown (C). Rhythm strength was correlated to the atherosclerotic lesion area (D) and the relative amount of severe atherosclerotic lesions (E), and the R-squared and P-values are shown for the significant correlation between rhythm strength and severe atherosclerotic lesions within the LD-DL group, as evaluated by Pearson correlation analysis. Data are expressed as individual values or as means  $\pm$  SEM. Significance was tested by the two-tailed unpaired Student T test (A) or mixed models (B). \*\* $P < 0.01$ , \*\*\* $P < 0.001$  compared to the LD control group.

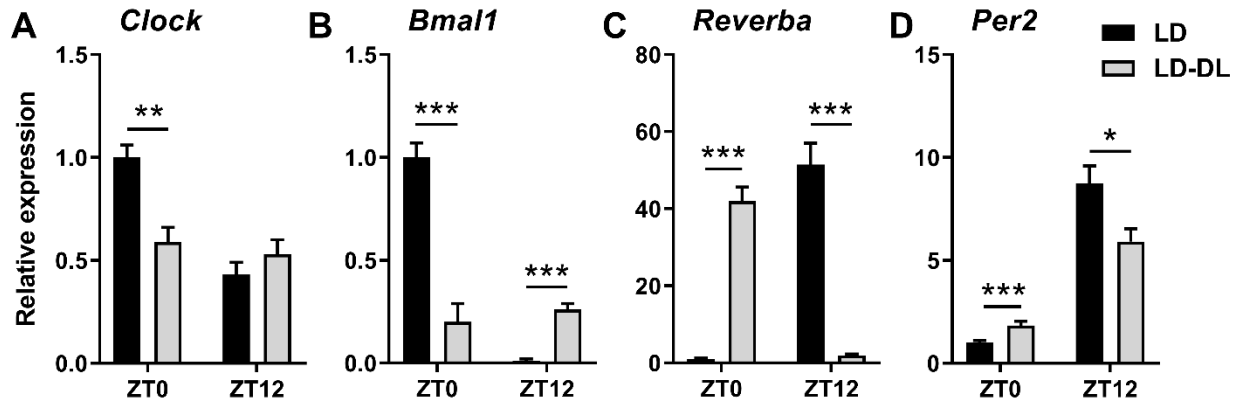

**Figure S3. Expression of clock genes in the aorta is disrupted in mice exposed to shifts in light-dark cycle.** APOE\*3-Leiden.CETP mice fed a Western-type diet were exposed to regular light-dark cycles (LD) or weekly alternating light-dark cycles (LD-DL) ( $n = 18/\text{group}$ ) for 10 weeks, after which aortas were isolated at either ZT0 or ZT12 ( $n = 7-8$  per timepoint/group) for gene expression analysis of *Clock* (A), *Bmal1* (B), *Revrba* (C), and *Per2* (D). Data are expressed as means  $\pm$  SEM. Significance was tested by two-way ANOVA. \* $P < 0.05$ , \*\* $P < 0.01$ , \*\*\* $P < 0.001$  compared to the LD control group.

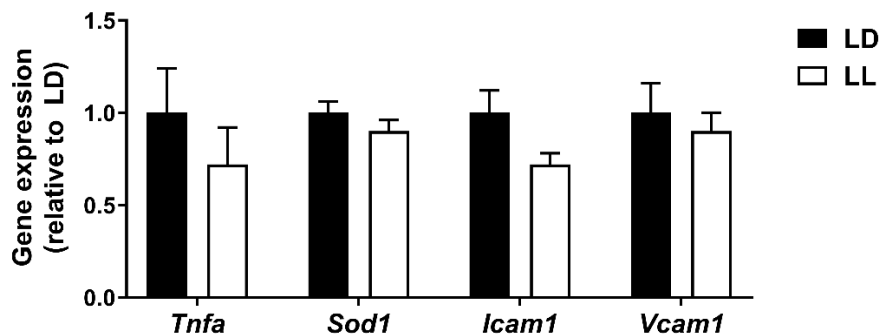

**Figure S4. Expression of markers of inflammation, oxidative stress and leukocyte recruitment in the aorta is unaffected by exposure to constant light.** APOE\*3-Leiden.CETP mice fed a Western-type diet were exposed to LD or LL ( $n = 18/\text{group}$ ) for 14 weeks, after which aortas were isolated ( $n = 9/\text{group}$ ) at ZT2 for gene expression analysis of markers of inflammation (*Tnfa*), oxidative stress (*Sod1*), and leukocyte recruitment (*Icam1* and *Vcam1*). Data are expressed as means  $\pm$  SEM. Significance was tested by the two-tailed unpaired Student T test.
